# Supplementary material for: Arsenene/Ca(OH)2 van der Waals heterostructure: strain tunable electronic and photocatalytic properties
Source: Royal Society of Chemistry journal article supplement (doi:10.1039/c7ra08029h), 2017-01-01
Supplement: c7ra08029h1.pdf [file c7ra08029h1.pdf]

## Supplementary material

### Arsenene/ $\text{Ca}(\text{OH})_2$ van der Waals heterostructure: Strain tunable electronic and photocatalytic properties

Xiao-Hua Li,<sup>a</sup> Bao-Ji Wang,<sup>\*a</sup> Xiao-Lin Cai,<sup>a</sup> Wei-Yang Yu,<sup>a</sup> Li-Wei Zhang,<sup>a</sup> Guo-Dong Wang,<sup>a</sup> and San-Huang Ke<sup>\*b</sup>

<sup>a</sup>School of Physics and Electronic Information Engineering, Henan Polytechnic University, Jiaozuo 454000, China

<sup>b</sup>MOE Key Laboratory of Microstructured Materials, School of Physics Science and Engineering, Tongji University, Shanghai 200092, China

\*Corresponding author: [wbj@hpu.edu.cn](mailto:wbj@hpu.edu.cn)

†Corresponding author: [shke@tongji.edu.cn](mailto:shke@tongji.edu.cn)

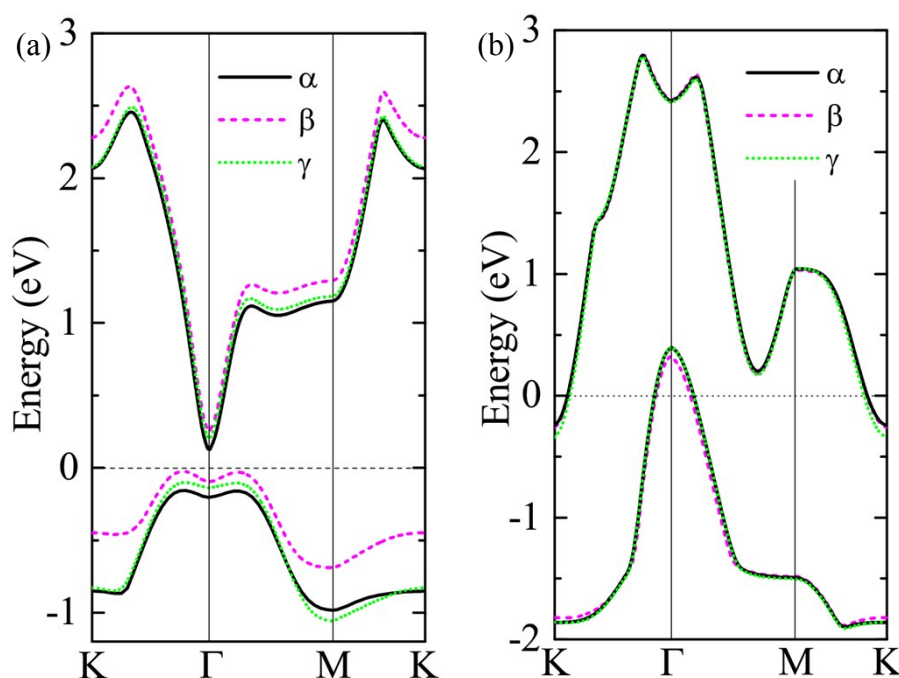

Fig. S1. (Color online) The evolutions of the highest valence bands and the lowest conduction bands of the A/C heterostructures with  $\alpha$ -,  $\beta$ -, and  $\gamma$ -stacking under (a) +10% tensile and (b) -10% compressive biaxial strains, respectively.

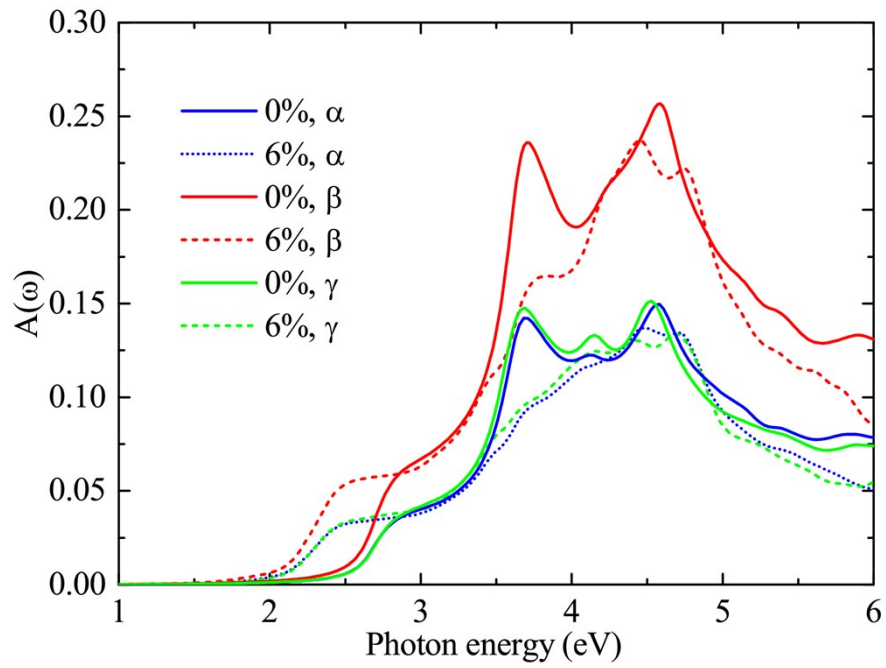

Fig.S2. (Color online) The optical absorbance spectrum  $A(\omega)$  of A/C heterostructure with  $\alpha$ -,  $\beta$ -, and  $\gamma$ -stacking at the strains of 0% and +6%.  $A(\omega)$  is calculated using the PBE functional followed by a rigid energy shift to take into account the bandgap underestimation of the PBE functional.
